# Supplementary material
Source: PubMed Central journal article supplement (PMC9516780)
Supplement: kiac312_supplementary_data.pdf [file kiac312_supplementary_data.pdf]

## Supplemental Information

**Wild type**

MENTSPEKLD~~RTQ~~~~E~~~~K~~~~N~~~~R~~~~R~~~~I~~~~Q~~~~M~~~~K~~~~Y~~~~L~~~~S~~~~S~~~~K~~~~F~~~~S~~~~L~~~~I~~~~P~~~~P~~~~H~~~~H~~~~H~~~~Q~~~~Y~~~~S~~~~A~~~~K~~~~D~~~~M~~~~V~~~~T~~~~Q~~~~Q~~~~D~~~~Q~~~~I~~~~D~~~~Q~~~~A~~~~I~~~~T~~~~Y~~~~I~~~~E~~~~K~~~~L~~KERVDVLMRRKDKII  
AQGTSDDSKKFMPTSTSCSNIKLP~~M~~~~I~~~~E~~~~V~~~~R~~~~E~~~~L~~~~G~~~~S~~~~T~~~~I~~~~E~~~~V~~~~I~~~~L~~~~V~~~~S~~~~C~~~~L~~~~Q~~~~K~~~~F~~~~T~~~~M~~~~Q~~~~E~~~~V~~~~I~~~~I~~~~L~~~~E~~~~E~~~~G~~~~V~~~~Q~~~~V~~~~V~~~~T~~~~A~~~~N~~~~F~~~~S~~~~T~~~~I~~~~G~~~~D~~~~K~~~~V~~~~Y~~~~T~~~~I~~~~H~~~~A~~  
QVKITRLGVDASRVYLRQLQNLIC\*

 **$\Delta$ nrd1-1**

MENTSPEKRQENTRKEQKNSNEVSFF\*ALFSYSSTPPPILS\*GYGDATRPN\*SSHYLH\*KIERKSR~~C~~~~I~~~~N~~~~E~~~~K~~~~E~~~~G~~\*DYSTR  
YK\*\*FKEIHAFNIL\*QY\*ITYD\*S\*RVGFNYRGYFS\*LLAKKVHHARGDNHLRGRSSSCYR\*FFNNRR\*GLLYSCSG  
ENYEIRG\*CIKGLFEIAKSDLL

 **$\Delta$ nrd1-2**

MENTRTGKHKRTEEFK\*SIFLLSSFLLFLHTTTNTQLRIW\*RNKTKLIKPLLTKN\*KKE\*MY\*\*EGRIRL\*HKVQVM  
IQRNSCLQHLVAILNYL\*LKLESWVQL\*RLF\*LVACKKSSPCKR\*\*SS\*RKKEFKLLPLIFQQSAIRFTILFMLR\*KLRD\*  
GLMHQGSIDCKI\*FA

**Supplemental Figure S1. The wild-type and mutated Nrd1 protein sequences.** Mutations in the  $\Delta$ nrd1-1 and  $\Delta$ nrd1-2 lines introduce a premature stop codon at the 27<sup>th</sup> or 18<sup>th</sup> amino acid of the Nrd1 protein, respectively. Amino acids in red indicate open reading frames. The asterisks represent stop codons. In the wild-type sequence, the amino acids highlighted in yellow constitute the bHLH domain. The E (glutamic acid) and R (arginine) in blue are known to be required for binding of the E-box motif in the promoter. Based on the above, even if a truncated protein is produced in the  $\Delta$ nrd1-1 and  $\Delta$ nrd1-2 lines it would lack the E-box motif and therefore be non-functional.

**A**

```

Nrd1 MEN-----TSPEKLDKRTQEKNRRIQMKYLSSKLFSLIPPHHHQYSAKDMVTQQDQ
Solyc03g114237 MESS---NINIVTASEKIERKTQEKIRRIQMKYLTSKLFSLIPPHHHQ--STKEVLTKQDK
Solyc03g114233 MENNSVNNIVSTSSVQKLDRKTQEKNRRIQMKYLYAKLFSLIPLNHS----KEVLTKQHDH
***: : : :*:***** ***** :***** :* *::*:*:

Nrd1 IDQAITIYIEKLERVDVLMRRKDKIIAQGTSDDSKKFMPSTSCSNIKLPMEVRELGSTI
Solyc03g114237 IDAAITYIKQLKERIEVLERRKEEVVAQETCDDSKKSMPPTTCS- IKSPMVEVKELDSTL
Solyc03g114233 VDQATTFIEELKERVEVLKRRKDEVVAQIIIGDSSKKSISTTTCT- IK-----VRELDSTL
:* * *:*:*:*****:*** *****:::*** ***** : :*:*: ** *::*:.**:*

Nrd1 EVILVSLQKKFTMQEVI IILEEEGVQVVTANFSTIGDKVYTYTIHAQVKITRLGVDASRV
Solyc03g114237 EVILVSGLQKNFILQEVIKIIEQEGAQVVSNYSTIDDTIYMIHAQVKIARLGIDASRV
Solyc03g114233 EVILTSGLQKNFTLQEVIKIIEEEGAQVVTANYSTIDGTIYYTYTIHAQVKITRLGIDASRI
****.* ***:* :***** *:*:**.****:**:*:*...:* *****:*:*:*:*:*:

Nrd1 YLRLQNLIC
Solyc03g114237 HLRLQKMVC
Solyc03g114233 HFRLQKLVS
:*:*:*:*.

```

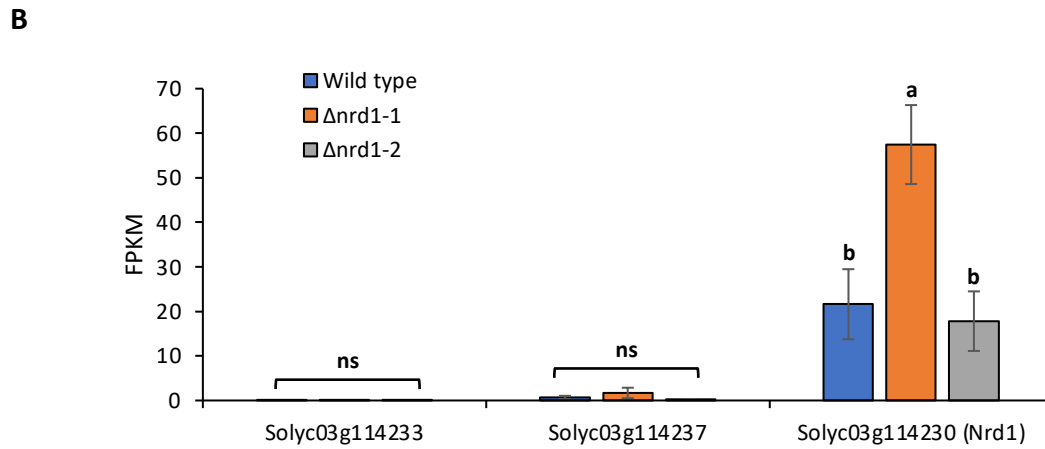

**Supplemental Figure S2. Analysis of the two most closely related genes to Nrd1 in tomato.** **A**, Amino acid sequence alignment of the two closest tomato Nrd1 homologs. *Solyc03g114233* and *Solyc03g114237* are 60.3% and 65.0% similarity to the Nrd1 protein sequence, respectively. **B**, Transcript abundance of the two closest tomato Nrd1 homologs in wildtype and  $\Delta nrd1$  mutants, 6 h after treatment with  $5 \times 10^6$  cfu/mL DC3000 $\Delta avrPto\Delta avrPtoB$  (DC3000 $\Delta\Delta$ ). FPKM: fragments per kilobase of transcript per million mapped fragments. Four plants for each genotype were used. Bars show means  $\pm$  standard deviation (SD). Different letters indicate significant differences based on a one-way ANOVA followed by Tukey's HSD test ( $p < 0.05$ ). ns, no significant difference.

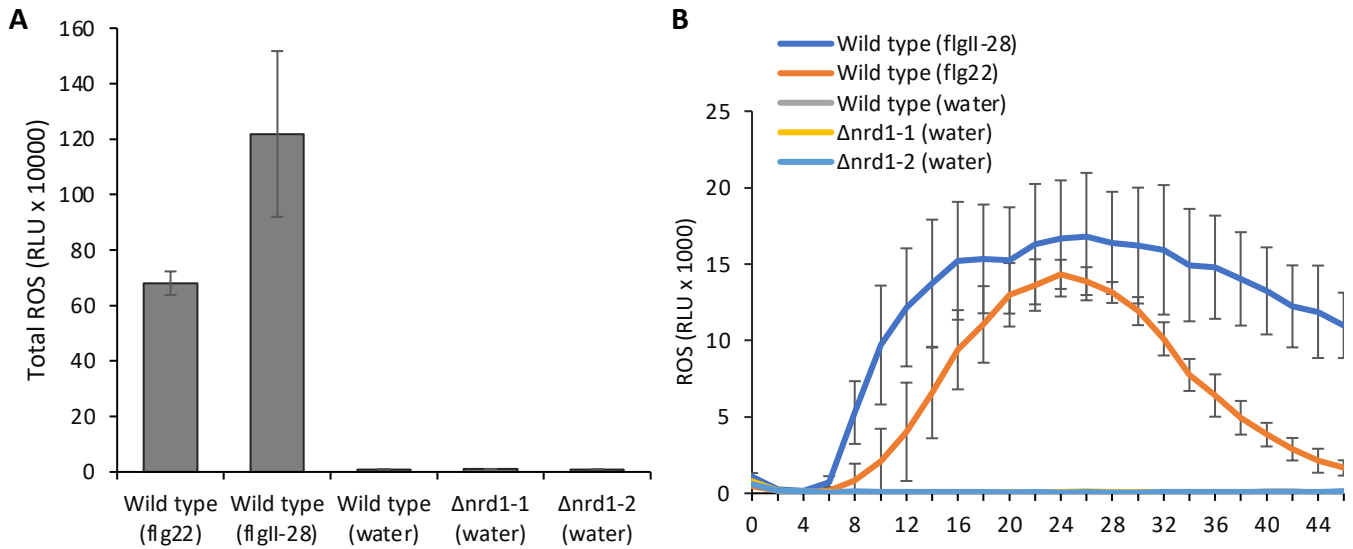

**Supplemental Figure S3. The  $\Delta nrd1$  mutants do not constitutively produce reactive oxygen species**

**(ROS).** RG-PtoR wild-type plants were treated with 50 nM flg22 or 50 nM flgII-28 as a positive control. Leaf discs from wild type or  $\Delta nrd1$  mutants were treated with water only. Relative light units (RLU) were measured over 45 minutes. **Three plants (three leaf discs per plant) were tested per treatment.** Bars represent means  $\pm$  **standard deviation (SD)** in **(A)** and **(B)**. The experiment was performed twice with similar results.

**A**

| Gene name | Position of the predicted element | Predicted E-box sequence |
|-----------|-----------------------------------|--------------------------|
| D1        | +859                              | CATTTG                   |
|           | +216                              | CATATG                   |
|           | +108                              | CAATTG                   |
|           | +56                               | CACGTG                   |
|           | +5                                | CAACTG                   |
| D2        | +329                              | CACTTG                   |
| D3        | +875                              | CAGCTG                   |
|           | +805                              | CACATG                   |
|           | +798                              | CAATTG                   |
| D4        | +63                               | CATATG                   |
|           | +655                              | CAAGTG                   |
| D5        | +109                              | CACGTG                   |
|           | +73                               | CACCTG                   |
| D6        | +850                              | CATATG                   |
|           | +499                              | CAATTG                   |
| S1        | +889                              | CATTTG                   |
|           | +369                              | CATATG                   |
| S2        | +910                              | CAAATG                   |
|           | +893                              | CACTTG                   |
|           | +875                              | CAAATG                   |
|           | +489                              | CAGTTG                   |
|           | +39                               | CATATG                   |
| S3        | +600                              | CAAGTG                   |
|           | +403                              | CAAATG                   |
|           | +219                              | CATGTG                   |

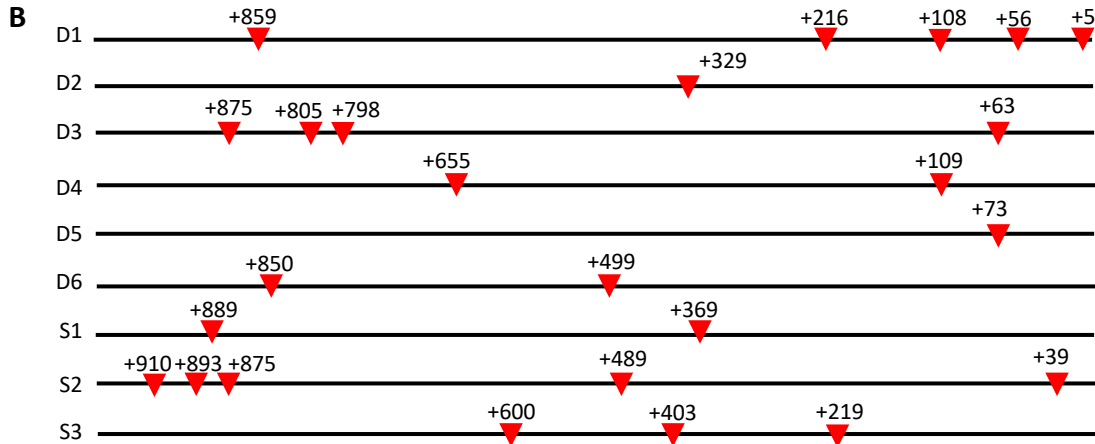

**Supplemental Figure S4. Predicted E-box elements (CANNTG) in Nrd1-regulated putative defense and susceptibility genes. A-B, 1 kb DNA sequence upstream of the 5' untranslated region (5'UTR) or coding region (CDS) of each gene was analyzed by PlantPan2.0 (Chow et al., 2016) to identify potential bHLH-binding elements, denoted with inverted red triangles. The first nucleotide of the promoter sequence upstream of 5'UTR or CDS is designated as "+1".**

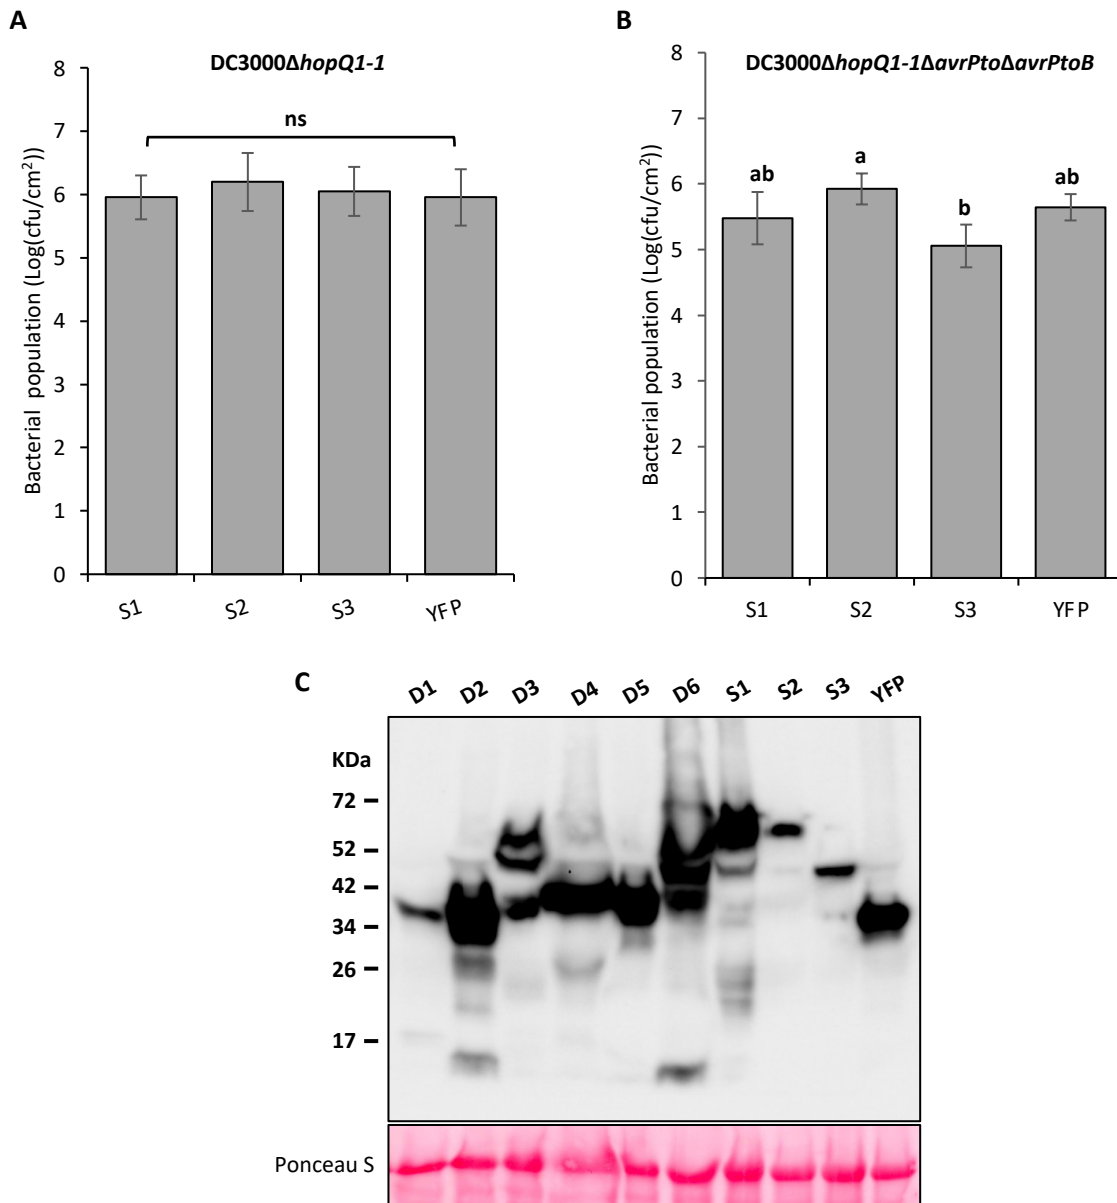

**Supplemental Figure S5. Transient overexpression of putative susceptibility genes proteins in *Nicotiana benthamiana* leaves followed by a bacterial pathogenicity assay and confirming expression of the D and S proteins.** **A-B**, Five-week-old *Nicotiana benthamiana* plants were syringe-infiltrated with *Agrobacterium* strains (1D1249) containing a binary expression vector expressing each gene (OD = 0.5). Two days later, the same agro-infiltrated spots were syringe-infiltrated with  $5 \times 10^4$  cfu/mL DC3000ΔhopQ1-1 (**A**) or  $5 \times 10^4$  cfu/mL DC3000ΔhopQ1-1ΔavrPtoΔavrPtoB (**B**). Bacterial populations were measured two days after infiltration. **cfu**, colony-forming unit. **A-B**, Three plants were tested with each gene in each experiment. Bars represent means  $\pm$  SD. Different letters indicate significant differences based on a one-way ANOVA followed by Student's *t* test ( $p < 0.05$ ). ns, no significant difference. **C**, Protein expression by western blotting. Proteins were extracted from *N. benthamiana* leaves two days after agroinfiltration. S proteins with an HA epitope tag were detected by immunoblotting with  $\alpha$ -HA antibody.

**Agp1 protein sequence:**

MALSHPMTIFSLFLTLALTAQSPMMAPIMPPSIMMPPTTSTTTPPPMSSMSPPPSAMSPIPSIMS  
 PPMSPMIPSMSPMGPMTIMSPMDSPPAPAGPGMAPGMSIPGPAPGPMGGESMASPPPSSGFVHG  
 ISISMAMVAIIGSVALFF

| Position | Score   | Comment  |
|----------|---------|----------|
| 4        | 0.006   |          |
| 8        | 0.018   |          |
| 11       | 0.037   |          |
| 15       | 0.017   |          |
| 20       | 0.041   |          |
| 24       | 0.130   |          |
| 30       | 0.713   | Positive |
| 34       | 0.767   | Positive |
| 35       | 0.795   | Positive |
| 37       | 0.887   | Positive |
| 41       | 0.920   | Positive |
| 42       | 0.768   | Positive |
| 43       | 0.930   | Positive |
| 44       | 0.885   | Positive |
| 45       | 0.895   | Positive |
| 46       | 0.882   | Positive |
| 51       | 0.827   | Positive |
| 52       | 0.890   | Positive |
| 54       | 0.826   | Positive |
| 58       | 0.872   | Positive |
| 61       | 0.749   | Positive |
| 63       | 0.652   | Positive |
| 65       | 0.910   | Positive |
| 66       | 0.776   | Positive |
| 68       | 0.882   | Positive |
| 73       | 0.628   | Positive |
| 76       | 0.522   | Positive |
| 78       | 0.874   | Positive |
| 80       | 0.721   | Positive |
| 86       | 0.465   |          |
| 88       | 0.680   | Positive |
| 90       | 0.637   | Positive |
| 94       | 0.738   | Positive |
| 108      | 0.876   | Positive |
| 109      | 0.710   | Positive |
| 121      | 0.428   |          |
| 124      | 0.312   |          |
| 128      | 0.073   |          |
| 129      | 0.014   |          |
| 136      | 0.011   |          |
| 138      | 0.007   |          |
| 147      | 4.1E-06 |          |

**Supplemental Figure S6. Prediction of glycosylation sites in the Agp1 protein.** Glycosylation sites were predicted using NetOGlyc-4.0 (Steentoft et al., 2013) with a cutoff score higher than 0.5 (marked as “Positive”). The first amino acid of Agp1 protein is designated as position “1”. Positive sites of glycosylated amino acids are highlighted in red and underlined.

**Supplemental Table S1.** Summary of disease assays with the  $\Delta nrd1$  mutant plants.

| <b>Bacterial strains</b>                             | <b>Inoculum (cfu/mL)<sup>1</sup></b> | <b>Disease symptom (compared to wild type)</b> | <b>Bacterial growth (compared to wild type)</b> |
|------------------------------------------------------|--------------------------------------|------------------------------------------------|-------------------------------------------------|
| DC3000                                               | 5x10 <sup>6</sup>                    | ns <sup>2</sup>                                | ns                                              |
| DC3000 $\Delta$ avrPto $\Delta$ avrPtoB              | 5x10 <sup>4</sup>                    | More resistant                                 | Less bacterial growth                           |
| NYS-T1                                               | 1x10 <sup>4</sup>                    | ns                                             | ns                                              |
| T1                                                   | 2x10 <sup>4</sup>                    | ns                                             | ns                                              |
| Pst14 $\Delta$ avrPto                                | 2x10 <sup>4</sup>                    | ns                                             | ns                                              |
| Pst25 $\Delta$ avrPto                                | 2x10 <sup>4</sup>                    | ns                                             | ns                                              |
| <i>Xanthomonas campestris</i> pv. <i>vesicatoria</i> | 5x10 <sup>4</sup>                    | ns                                             | ns                                              |

<sup>1</sup>cfu, colony-forming unit

<sup>2</sup>ns, no significant difference



**Supplemental Table S2.** The 51 *Nrd1*-regulated putative defense and susceptibility genes identified by RNA-Seq.

| Gene ID                                | RNA-Seq data from this study |                            |                 |                         |                            |                 | RNA-Seq data from Rosli et al. <sup>1</sup>           |
|----------------------------------------|------------------------------|----------------------------|-----------------|-------------------------|----------------------------|-----------------|-------------------------------------------------------|
|                                        | FPKM in $\Delta nrd1-1$      | $\Delta nrd1-1$ /wild type | Adjusted P      | FPKM in $\Delta nrd1-2$ | $\Delta nrd1-2$ /wild type | Adjusted P      |                                                       |
| <b>Solyc05g024190 (D1)<sup>2</sup></b> | <b>3.7</b>                   | <b>2.8</b>                 | <b>0.0013</b>   | <b>5.1</b>              | <b>3.9</b>                 | <b>0.0079</b>   | <b>flgII-28 suppressed</b>                            |
| <b>Solyc07g061790 (D2)</b>             | <b>216.42</b>                | <b>4.4</b>                 | <b>2.45E-05</b> | <b>324.36</b>           | <b>6.5</b>                 | <b>2.66E-08</b> | <b>flgII-28 and csp22 suppressed/ETI suppressed</b>   |
| <b>Solyc02g077330 (D3)</b>             | <b>2.05</b>                  | <b>2.7</b>                 | <b>0.01</b>     | <b>2.64</b>             | <b>3.5</b>                 | <b>0.011</b>    | <b>flgII-28/flg22/csp22 suppressed/ETI suppressed</b> |
| <b>Solyc12g009650 (D4)</b>             | <b>1544.34</b>               | <b>2.2</b>                 | <b>6.79E-13</b> | <b>1630.19</b>          | <b>2.3</b>                 | <b>2.97E-05</b> | <b>flgII-28 and csp22 suppressed/ETI-suppressed</b>   |
| <b>Solyc11g019910 (D5)</b>             | <b>56.23</b>                 | <b>2.2</b>                 | <b>0.005</b>    | <b>68</b>               | <b>2.6</b>                 | <b>5.81E-05</b> | <b>flgII-28 and csp22 suppressed/ETI-induced</b>      |
| <b>Solyc08g078020 (D6)</b>             | <b>696.82</b>                | <b>3.2</b>                 | <b>3.81E-11</b> | <b>800.1</b>            | <b>3.6</b>                 | <b>3.40E-09</b> | <b>flgII-28 and csp22 suppressed/ETI suppressed</b>   |
| Solyc11g021060                         | 917.98                       | 4.4                        | 1.01E-06        | 985.23                  | 4.7                        | 2.45E-09        | csp22 suppressed/ETI suppressed                       |
| Solyc12g011010                         | 2.29                         | 3.0                        | 0.033           | 3.1                     | 4.0                        | 0.0066          | ETI suppressed                                        |
| Solyc01g104720                         | 502.78                       | 2.2                        | 0.0015          | 762.9                   | 3.4                        | 8.57E-12        | csp22 suppressed/ETI suppressed                       |
| Solyc03g019890                         | 26.54                        | 2.2                        | 1.61E-14        | 32                      | 2.6                        | 1.20E-18        | csp22 suppressed/ETI suppressed                       |
| Solyc06g160050                         | 732.67                       | 39.7                       | 8.94E-10        | 1134.4                  | 61.5                       | 3.29E-08        | No record                                             |
| Solyc05g021245                         | 16.12                        | 2.6                        | 0.004           | 97                      | 15.8                       | 1.57E-21        | No record                                             |
| Solyc02g161340                         | 10.46                        | 5.0                        | 4.87E-15        | 10.62                   | 5.1                        | 6.12E-14        | No record                                             |
| Solyc04g009850                         | 17.36                        | 4.0                        | 1.23E-07        | 12.97                   | 3.0                        | 4.40E-05        | flgII-28 and csp22 induced/ETI-induced                |
| Solyc12g017800                         | 4.08                         | 408.0                      | 1.81E-32        | 4.12                    | 412.0                      | 1.07E-30        | <b>Not expressed</b>                                  |
| Solyc05g024230                         | 7.65                         | NA*                        | 1.80E-11        | 9.74                    | NA                         | 1.68E-13        | Induced in hpBti9 and one hpPti line                  |
| Solyc01g066790                         | 103.32                       | 430.5                      | 6.94E-40        | 42.82                   | 178.4                      | 1.20E-18        | Induced in one hpPti line                             |
| Solyc05g055460                         | 1.38                         | 46.0                       | 0.0003          | 2.05                    | 68.3                       | 0.00015         | Not induced                                           |
| Solyc07g045127                         | 0.64                         | 64.0                       | 0.0005          | 0.55                    | 55.0                       | 0.00073         | No record                                             |
| Solyc09g082340                         | 0.51                         | 51.0                       | 0.0002          | 0.57                    | 57.0                       | 0.00099         | Not induced                                           |
| Solyc08g150133                         | 0.13                         | 13.0                       | 0.016           | 0.24                    | 24.0                       | 0.00292         | No record                                             |
| Solyc07g026710                         | 4.67                         | 9.7                        | 0.005           | 10.61                   | 22.1                       | 1.05E-13        | Not induced                                           |
| Solyc03g096430                         | 23.19                        | 105.4                      | 3.31E-12        | 4.99                    | 22.7                       | 5.85E-08        | Not induced                                           |
| Solyc12g036740                         | 1.44                         | 12.0                       | 0.022           | 2.62                    | 21.8                       | 0.00418         | Not induced                                           |
| Solyc07g055490                         | 0.56                         | 18.7                       | 8.11E-06        | 0.45                    | 15.0                       | 0.00468         | Not induced                                           |
| Solyc12g087830                         | 25.9                         | 4.6                        | 0.024           | 70.28                   | 12.5                       | 7.02E-23        | Not clear                                             |
| Solyc07g056704                         | 0.54                         | 6.8                        | 0.0002          | 1.01                    | 12.6                       | 2.50E-08        | No record                                             |
| Solyc03g121900                         | 11.03                        | 6.9                        | 5.33E-12        | 18.23                   | 11.5                       | 6.67E-16        | Induced in one hpPti line                             |

Continued

<sup>1</sup> Rosli et al., (2013). Genome Biology 14:R139<sup>2</sup> Shown in bold are the genes selected for further functional characterization based on criteria discussed in the Results.

**Supplemental Table S2 (continued).** The 51 *Nrd1*-regulated putative defense and susceptibility genes identified by RNA-Seq.

| Gene ID                    | RNA-seq in this study   |                            |                 |                         |                            |                 | Rosli's RNA-seq data                              |
|----------------------------|-------------------------|----------------------------|-----------------|-------------------------|----------------------------|-----------------|---------------------------------------------------|
|                            | FPKM in $\Delta nrd1-1$ | $\Delta nrd1-1$ /wild type | Adjusted P      | FPKM in $\Delta nrd1-2$ | $\Delta nrd1-2$ /wild type | Adjusted P      |                                                   |
| Solyc12g062200             | 18.92                   | 7.2                        | 0.0095          | 27.17                   | 10.4                       | 0.0004          | Not clear                                         |
| Solyc03g096420             | 4.19                    | 17.5                       | 5.19E-05        | 2.14                    | 8.9                        | 0.0015          | Not induced                                       |
| Solyc07g056708             | 0.31                    | 7.8                        | 0.037           | 0.36                    | 9.0                        | 0.0161          | No record                                         |
| Solyc00g011660             | 0.48                    | 4.4                        | 0.004           | 0.85                    | 7.7                        | 7.83E-05        | Not induced                                       |
| Solyc05g051310             | 1.23                    | 12.3                       | 3.12E-05        | 0.72                    | 7.2                        | 0.0421          | Not induced                                       |
| Solyc08g067530             | 1.82                    | 4.8                        | 0.0023          | 2.31                    | 6.1                        | 0.0005          | Not clear                                         |
| Solyc09g089780             | 22.22                   | 10.7                       | 3.47E-06        | 12.96                   | 6.2                        | 0.0015          | csp22 and flg22 induced                           |
| Solyc01g079920             | 0.53                    | 8.8                        | 1.57E-05        | 0.34                    | 5.7                        | 0.0043          | csp22 and flg22/flgII-28 induced                  |
| Solyc01g107370             | 4.36                    | 5.5                        | 4.09E-06        | 3.9                     | 4.9                        | 1.75E-05        | Not induced                                       |
| Solyc07g055690             | 337.65                  | 12.2                       | 7.22E-09        | 133.88                  | 4.8                        | 0.0059          | csp22 and flg22/flgII-28 induced/<br>ETI induced? |
| Solyc10g084600             | 9.14                    | 3.9                        | 0.009           | 7.95                    | 3.4                        | 0.0147          | ETI suppressed?                                   |
| Solyc07g009380             | 397.73                  | 3.9                        | 2.02E-11        | 319.41                  | 3.1                        | 4.35E-07        | Not clear                                         |
| Solyc09g091060             | 3.39                    | 4.5                        | 3.92E-05        | 2.01                    | 2.7                        | 0.0008          | Not induced                                       |
| Solyc12g011200             | 6.75                    | 10.7                       | 2.01E-08        | 1.68                    | 2.7                        | 0.034           | Not induced                                       |
| Solyc02g065470             | 346.18                  | 3.4                        | 5.52E-09        | 249.33                  | 2.4                        | 0.0091          | ETI induced                                       |
| <b>Solyc03g112030 (S1)</b> | <b>1.74</b>             | <b>0.31</b>                | <b>0.0238</b>   | <b>2.31</b>             | <b>0.41</b>                | <b>0.0078</b>   | <b>flgII-28 induced/ETI induced</b>               |
| <b>Solyc02g088210 (S2)</b> | <b>5.29</b>             | <b>0.46</b>                | <b>0.0006</b>   | <b>4.11</b>             | <b>0.36</b>                | <b>5.14E-09</b> | <b>csp22 induced/ETI induced</b>                  |
| <b>Solyc05g007440 (S3)</b> | <b>7.36</b>             | <b>0.29</b>                | <b>3.05E-30</b> | <b>8.87</b>             | <b>0.35</b>                | <b>4.42E-19</b> | <b>ETI suppressed</b>                             |
| Solyc08g074710             | 0.07                    | 0.03                       | 0.0021          | 0.46                    | 0.20                       | 0.0164          | Not expressed                                     |
| Solyc02g030520             | 0.11                    | 0.03                       | 0.0067          | 0.24                    | 0.06                       | 0.0432          | Not expressed                                     |
| Solyc07g064370             | 0.02                    | 0.02                       | 0.0001          | 0.03                    | 0.02                       | 0.0322          | Not induced                                       |
| Solyc07g064380             | 0.03                    | 0.02                       | 0.0009          | 0.01                    | 0.01                       | 0.0014          | Not induced                                       |
| Solyc06g043150             | 0.23                    | 0.21                       | 0.0037          | 0.48                    | 0.44                       | 0.0354          | Not induced                                       |

**Supplemental Table S3.** Primers used in this study.

| Primer name         | Primer sequence                                      | Purpose                                                | Solyc ID       |
|---------------------|------------------------------------------------------|--------------------------------------------------------|----------------|
| S1_CDS              | F:TTCGAATTCCAAGCTTGCCCATGATTTCTTATTTGCGGTATTTCC      | To clone the coding region of S1 into pJLSmart         | Solyc03g112030 |
|                     | R:ATAGGAATTCGGATCCGCCCGAATGCGTGGAGTTGCAACGAC         |                                                        |                |
| S2_CDS              | F:TTCGAATTCCAAGCTTGCCCATGAAATTCGGTAAAGAGTTCACAAC     | To clone the coding region of S2 into pJLSmart         | Solyc02g088210 |
|                     | R:ATAGGAATTCGGATCCGCCCGTTCCGGTGGATGGAAATCCTC         |                                                        |                |
| S3_CDS              | F:TTCGAATTCCAAGCTTGCCCATGGCGACGGAGCTAGAAGAATTG       | To clone the coding region of S3 into pJLSmart         | Solyc05g007440 |
|                     | R:ATAGGAATTCGGATCCGCCCGGAAGATGTCTCTGCTAACGAAG        |                                                        |                |
| D1_CDS              | F:TTCGAATTCCAAGCTTGCCCATGTCAATATGGGGAAAAATGTTCTTTC   | To clone the coding region of D1 into pJLSmart         | Solyc05g024190 |
|                     | R:ATAGGAATTCGGATCCGCCCGACTCCTATCTTACCAGTTACCG        |                                                        |                |
| D2_CDS              | F:TTCGAATTCCAAGCTTGCCCATGCTTAGTGTAAGTATGAATCTGTTG    | To clone the coding region of D2 into pJLSmart         | Solyc07g061790 |
|                     | R:ATAGGAATTCGGATCCGCCCGAATGGCAAGTGCTTTTTCAAATCA      |                                                        |                |
| D3_CDS              | F:TTCGAATTCCAAGCTTGCCCATGCTGATGAGGCTTCTGATTATC       | To clone the coding region of D3 into pJLSmart         | Solyc02g077330 |
|                     | R:ATAGGAATTCGGATCCGCCCGTCTAGTAAATCAACATTAATAGCTTTAAG |                                                        |                |
| D4_CDS              | F:TTCGAATTCCAAGCTTGCCCATGGAGTTCTCTAAGATAACTTCACTTC   | To clone the coding region of D4 into pJLSmart         | Solyc12g009650 |
|                     | R:ATAGGAATTCGGATCCGCCCGAATTCAGATTGGAAACAAGTGTAGCC    |                                                        |                |
| D5_CDS              | F:TTCGAATTCCAAGCTTGCCCATGGAAAATTATAGTCCTTATAATTCAA   | To clone the coding region of D5 into pJLSmart         | Solyc11g019910 |
|                     | R:ATAGGAATTCGGATCCGCCCGATAAAGGTGATTTATGAAAGCTAAAGCA  |                                                        |                |
| D6_CDS              | F:TTCGAATTCCAAGCTTGCCCATGGCTCTCTCACATCCTATGAC        | To clone the coding region of D6 into pJLSmart         | Solyc08g078020 |
|                     | R:ATAGGAATTCGGATCCGCCCGAAAAAAGTGCTACACTTCCAATAATTG   |                                                        |                |
| Agp1-SP-L12H        | F:ATTTTCTCTCATTTTCTTACATTTTTAGC                      | For mutagenesis in the signal peptide sequence of Agp1 | Solyc08g078020 |
|                     | R:TGTCATAGGATGTGAGAG                                 |                                                        |                |
| Agp1-SP-T20KA22H    | F:TCACCAATCCCCCATGATGGC                              | For mutagenesis in the signal peptide sequence of Agp1 | Solyc08g078020 |
|                     | R:GCCTTGAGGGCTAAAAATGTAAGAAAAAG                      |                                                        |                |
| Agp1-GPI-S128KS129K | F:TCCACCTCAAAGAAGGGATTTGTTTCATGGAATTAG               | For mutagenesis in the GPI anchor sequence of Agp1     | Solyc08g078020 |
|                     | R:GAAGCCATTGACTCACCAC                                |                                                        |                |
| Agp1-GPI-F151KF152K | F:TGTAGCACTTAAGAAGCGGGCGGATC                         | For mutagenesis in the GPI anchor sequence of Agp1     | Solyc08g078020 |
|                     | R:CTTCCAATAATTGCTACC                                 |                                                        |                |
| Agp1-ΔSP            | F:TTCGAATTCCAAGCTTGCCCATGCAATCCCCCATGATGGCCCCA       | To delete the signal peptide sequence of Agp1          | Solyc08g078020 |
|                     | R:ATAGGAATTCGGATCCGCCCGAAAAAAGTGCTACACTTCCAATAATTG   |                                                        |                |
| Agp1-ΔGPI           | R:TTCGAATTCCAAGCTTGCCCATGGCTCTCTCACATCCTATGAC        | To delete the GPI anchor sequence of Agp1              | Solyc08g078020 |
|                     | R:ATAGGAATTCGGATCCGCCCGTGGAGGTGGAGAAGCCATTGAC        |                                                        |                |
